# Supplementary material
Source: PubMed Central journal article supplement (PMC5711332)
Supplement: DC162523SupplementaryData.pdf [file DC162523SupplementaryData.pdf]

SUPPLEMENTARY DATA

**Supplementary Table 1. Quartiles (Q) of BMI change in the treatment groups of the Diabetes Control and Complications Trial (DCCT). Values represent the differences between baseline and closeout visits in the DCCT.**

|                     |           | <b>Mean</b> | <b>Std Dev</b> | <b>Min</b> | <b>Max</b> |
|---------------------|-----------|-------------|----------------|------------|------------|
| <b>Intensive</b>    | <b>Q1</b> | -0.09       | 1.12           | -6.16      | 1.06       |
|                     | <b>Q2</b> | 1.87        | 0.40           | 1.07       | 2.60       |
|                     | <b>Q3</b> | 3.49        | 0.60           | 2.62       | 4.56       |
|                     | <b>Q4</b> | 6.83        | 2.22           | 4.56       | 17.08      |
| <b>Conventional</b> | <b>Q1</b> | -0.097      | 1.38           | -8.74      | 0.30       |
|                     | <b>Q2</b> | 0.80        | 0.31           | 0.31       | 1.31       |
|                     | <b>Q3</b> | 1.87        | 0.31           | 1.32       | 2.42       |
|                     | <b>Q4</b> | 3.83        | 1.28           | 2.43       | 9.65       |

Units are kg/m<sup>2</sup>.

SUPPLEMENTARY DATA

**Supplementary Table 2. Clinical characteristics of DCCT/EDIC treatment groups at the DCCT closeout visit by quartiles of weight gain.**

| Characteristics                       | Intensive               |                         |                  | Conventional            |                         |                  |
|---------------------------------------|-------------------------|-------------------------|------------------|-------------------------|-------------------------|------------------|
|                                       | Minimal Gainers         | Excessive Gainers       | <i>P</i> -value* | Minimal Gainers         | Excessive Gainers       | <i>P</i> -value* |
| N                                     | 453                     | 151                     |                  | 457                     | 152                     |                  |
| Age (yr)                              | 35 ± 6                  | 37 ± 6                  | 0.0149           | 35 ± 6                  | 35 ± 6                  | 0.4978           |
| Female sex (%)                        | 44                      | 64                      | <0.0001          | 43                      | 49                      | 0.1964           |
| Weight (kg)                           | 75 ± 13                 | 90 ± 15                 | <0.0001          | 74 ± 12                 | 80 ± 14                 | <0.0001          |
| BMI (kg/m <sup>2</sup> )              |                         |                         |                  |                         |                         |                  |
| At baseline                           | 23 ± 3                  | 24 ± 3                  | <0.0001          | 24 ± 3                  | 24 ± 3                  | 0.2917           |
| At closeout                           | 25 ± 3                  | 31 ± 4                  | <0.0001          | 24 ± 3                  | 27 ± 3                  | <0.0001          |
| Iliac crest waist circumference (cm)  | 88 ± 9                  | 103 ± 16                | <0.0001          | 87 ± 8                  | 93 ± 10                 | <0.0001          |
| Secondary cohort (%)                  | 52                      | 54                      | 0.6048           | 51                      | 50                      | 0.8700           |
| Duration of diabetes (year)           | 12 ± 5                  | 12 ± 5                  | 0.7239           | 12 ± 5                  | 12 ± 5                  | 0.0992           |
| Current cigarette smoker (%)          | 28                      | 22                      | 0.1361           | 30                      | 22                      | 0.0785           |
| Blood pressure (mm Hg)                |                         |                         |                  |                         |                         |                  |
| Systolic                              | 116 ± 11                | 118 ± 12                | 0.0415           | 116 ± 12                | 119 ± 13                | 0.0317           |
| Diastolic                             | 75 ± 9                  | 76 ± 8                  | 0.0117           | 74 ± 9                  | 75 ± 10                 | 0.3202           |
| Lipids [mg/dl (mmol/l)]               |                         |                         |                  |                         |                         |                  |
| Total cholesterol                     | 178 ± 29<br>(4.6 ± 0.7) | 192 ± 30<br>(5.0 ± 0.8) | <0.0001          | 183 ± 33<br>(4.7 ± 0.9) | 190 ± 36<br>(4.9 ± 0.9) | 0.0285           |
| Triglycerides                         | 77 ± 43<br>(2.0 ± 1.1)  | 96 ± 64<br>(2.5 ± 1.7)  | <0.0001          | 81 ± 41<br>(2.1 ± 1.1)  | 96 ± 53<br>(2.5 ± 1.4)  | 0.0030           |
| LDL cholesterol                       | 111 ± 26<br>(2.9 ± 0.7) | 123 ± 27<br>(3.2 ± 0.7) | <0.0001          | 114 ± 30<br>(2.9 ± 0.8) | 118 ± 30<br>(3.1 ± 0.8) | 0.1201           |
| HDL cholesterol                       | 52 ± 14<br>(1.3 ± 0.4)  | 50 ± 12<br>(1.3 ± 0.3)  | 0.0462           | 52 ± 13<br>(1.3 ± 0.3)  | 53 ± 14<br>(1.4 ± 0.4)  | 0.7936           |
| Non-HDL cholesterol                   | 126 ± 30<br>(3.3 ± 0.8) | 142 ± 30<br>(3.7 ± 0.8) | <0.0001          | 130 ± 34<br>(3.4 ± 0.9) | 138 ± 35<br>(3.6 ± 0.9) | 0.0201           |
| Renal function (%)                    |                         |                         |                  |                         |                         |                  |
| AER ≥40 mg/24 hr                      | 5                       | 5                       | 0.9911           | 11                      | 12                      | 0.6832           |
| AER ≥300 mg/24 hr                     | 1                       | 0                       | 0.1561           | 2                       | 3                       | 0.5472           |
| Insulin dose (u/kg/day)               | 0.64 ± 0.20             | 0.74 ± 0.23             | <0.0001          | 0.61 ± 0.16             | 0.67 ± 0.19             | 0.0002           |
| HbA1c [% (mmol/mol)]                  | 7.3 ± 1.1<br>(56 ± 12)  | 7.4 ± 1.0<br>(58 ± 11)  | 0.0267           | 9.2 ± 1.5<br>(77 ± 16)  | 8.9 ± 1.5<br>(74 ± 17)  | 0.1970           |
| DCCT updated mean HbA1 [% (mmol/mol)] | 7.1 ± 0.8<br>(54 ± 9)   | 7.2 ± 0.7<br>(55 ± 8)   | 0.0868           | 9.0 ± 1.3<br>(75 ± 14)  | 8.9 ± 1.2<br>(74 ± 13)  | 0.3861           |

See text for definition of minimal and excessive weight gain groups. Data are means ± SD or %. AER=albumin excretion rate, BMI=body mass index, HDL=high-density lipoprotein, LDL=low-density lipoprotein. \* *P*-value from the Wilcoxon rank-sum test or the chi-square test comparing minimal vs. excessive gainers.

SUPPLEMENTARY DATA

**Supplementary Table 3. Clinical characteristics of DCCT/EDIC participants during EDIC years 5, 10, and 15 by quartiles of weight gain in the *conventionally* treated group**

| Characteristics                    | EDIC Year 5     |                     | EDIC Year 10    |                     | EDIC Year 15    |                     |
|------------------------------------|-----------------|---------------------|-----------------|---------------------|-----------------|---------------------|
|                                    | Minimal Gainers | Excessive Gainers * | Minimal Gainers | Excessive Gainers * | Minimal Gainers | Excessive Gainers * |
| N, Subjects at risk for CVD        | 452             | 152                 | 434             | 142                 | 425             | 140                 |
| Any medication use up to visit (%) |                 |                     |                 |                     |                 |                     |
| Anti-hypertensive medication†      | 17              | 22                  | 37              | 46                  | 46              | 55                  |
| Lipid-lowering medication          | 6               | 13 *                | 26              | 32                  | 48              | 54                  |
| Aspirin                            | 12              | 11                  | 33              | 35                  | 43              | 44                  |
| Hormone replacement therapy        | 5               | 4                   | 5               | 6                   | 4               | 4                   |
| DCCT/EDIC Time-weighted Means      |                 |                     |                 |                     |                 |                     |
| Weight (kg)                        | 75 ± 12         | 78 ± 13             | 77 ± 13         | 80 ± 14             | 79 ± 13         | 81 ± 14             |
| BMI (kg/m <sup>2</sup> )           | 25 ± 3          | 26 ± 3 *            | 25 ± 3          | 27 ± 4 *            | 26 ± 3          | 28 ± 4 *            |
| EDIC waist circumference (cm)      | 84 ± 9          | 88 ± 11 *           | 86 ± 10         | 89 ± 11 *           | 88 ± 10         | 90 ± 11             |
| Systolic blood pressure (mm Hg)    | 116 ± 8         | 119 ± 9 *           | 118 ± 8         | 120 ± 9             | 118 ± 8         | 120 ± 8             |
| Diastolic blood pressure (mm Hg)   | 74 ± 5          | 75 ± 5              | 75 ± 5          | 76 ± 5              | 74 ± 5          | 75 ± 5              |
| HDL cholesterol (mg/dl)            | 54 ± 12         | 54 ± 12             | 54 ± 12         | 55 ± 13             | 55 ± 12         | 56 ± 13             |
|                                    | (1.4 ± 0.3)     | (1.4 ± 0.3)         | (1.4 ± 0.3)     | (1.4 ± 0.3)         | (1.4 ± 0.3)     | (1.4 ± 0.3)         |
| LDL cholesterol (mg/dl)            | 113 ± 25        | 118 ± 26            | 112 ± 23        | 115 ± 23            | 109 ± 21        | 110 ± 19            |
|                                    | (2.9 ± 0.6)     | (3.1 ± 0.7)         | (2.9 ± 0.6)     | (3.0 ± 0.6)         | (2.8 ± 0.5)     | (2.8 ± 0.5)         |
| Total cholesterol (mg/dl)          | 183 ± 28        | 190 ± 29            | 182 ± 25        | 188 ± 27            | 180 ± 24        | 182 ± 23            |
|                                    | (4.7 ± 0.7)     | (4.7 ± 0.7)         | (4.7 ± 0.6)     | (4.9 ± 0.7)         | (4.7 ± 0.6)     | (4.7 ± 0.6)         |
| Triglycerides (mg/dl)              | 81 ± 37         | 91 ± 40 *           | 80 ± 37         | 89 ± 38 *           | 80 ± 38         | 84 ± 35             |
|                                    | (2.1 ± 1.0)     | (2.4 ± 1.0)         | (2.1 ± 1.0)     | (2.3 ± 1.0)         | (2.1 ± 1.0)     | (2.2 ± 0.9)         |
| DCCT HbA1c (%)                     | 9.0 ± 1.3       | 8.9 ± 1.2           | 9.0 ± 1.2       | 8.9 ± 1.2           | 9.0 ± 1.2       | 8.9 ± 1.2           |
|                                    | (75 ± 14)       | (74 ± 13)           | (75 ± 13)       | (74 ± 13)           | (75 ± 13)       | (74 ± 13)           |
| EDIC HbA1c (%)                     | 8.3 ± 1.2       | 8.2 ± 1.2           | 8.1 ± 1.1       | 8.0 ± 1.0           | 7.9 ± 1.0       | 8.0 ± 1.0           |
|                                    | (67 ± 13)       | (66 ± 13)           | (75 ± 12)       | (64 ± 11)           | (63 ± 11)       | (64 ± 11)           |
| DCCT/EDIC HbA1c (%)                | 8.7 ± 1.1       | 8.6 ± 1.1           | 8.4 ± 1.0       | 8.4 ± 1.0           | 8.2 ± 0.9       | 8.2 ± 0.9           |
|                                    | (72 ± 12)       | (70 ± 12)           | (68 ± 11)       | (68 ± 11)           | (66 ± 10)       | (66 ± 10)           |

## SUPPLEMENTARY DATA

Data are means  $\pm$  SD or %. BMI=body mass index, HDL=high-density lipoprotein, LDL=low-density lipoprotein. \* *P*-value < 0.01 from the Wilcoxon rank-sum test or the chi-square test comparing minimal vs. excessive gainers. † Includes angiotensin converting enzyme inhibitors, angiotensin receptor blockers, beta blockers, and calcium channel blockers.

SUPPLEMENTARY DATA

**Supplementary Table 4. Association in the DCCT *conventionally* treated group between quartiles of weight gain during DCCT and subsequent cardiovascular events throughout EDIC follow-up.**

|                                                                                      | Overall              |               | Minimal Gainers (n=457) |               | Excessive Gainers (n=152) |               | Unadjusted            | Partially Adjusted | Fully Adjusted   |
|--------------------------------------------------------------------------------------|----------------------|---------------|-------------------------|---------------|---------------------------|---------------|-----------------------|--------------------|------------------|
|                                                                                      | No. of Patients (%)* | No. of Events | No. of Patients (%)*    | No. of Events | No. of Patients (%)*      | No. of Events | Hazard Ratio (95% CI) |                    |                  |
| 1. Any cardiovascular disease event                                                  | 86 (14)              | 171           | 63 (14)                 | 107           | 23 (15)                   | 64            | 1.06 (0.66-1.71)      | 1.08 (0.67-1.75)   | 1.07 (0.65-1.74) |
| 2. Nonfatal acute myocardial infarction                                              | 24 (4)               | 28            | 15 (3)                  | 17            | 9 (6)                     | 11            |                       |                    |                  |
| 3. Nonfatal cerebrovascular event                                                    | 12 (2)               | 13            | 9 (2)                   | 10            | 3 (2)                     | 3             |                       |                    |                  |
| 4. Death from cardiovascular disease                                                 | 9 (1)                | 9             | 8 (2)                   | 8             | 1 (1)                     | 1             |                       |                    |                  |
| 5. Silent myocardial infarction                                                      | 24 (4)               | 25            | 17 (4)                  | 18            | 7 (5)                     | 7             |                       |                    |                  |
| 6. Confirmed angina                                                                  | 14 (2)               | 23            | 9 (2)                   | 12            | 5 (3)                     | 11            |                       |                    |                  |
| 7. Revascularization                                                                 | 43 (7)               | 63            | 29 (6)                  | 37            | 14 (9)                    | 26            |                       |                    |                  |
| Congestive Heart Failure                                                             | 8 (1)                | 10            | 4 (1)                   | 5             | 4 (3)                     | 5             |                       |                    |                  |
| Nonfatal myocardial infarction or stroke or death from cardiovascular disease (MACE) | 40 (7)               | 50            | 28 (6)                  | 35            | 12 (8)                    | 15            | 1.25 (0.64-2.46)      | 1.24 (0.62-2.50)   | 1.49 (0.72-3.11) |
| 1. Nonfatal acute myocardial infarction                                              | 24 (4)               | 28            | 15 (3)                  | 17            | 9 (6)                     | 11            |                       |                    |                  |
| 2. Nonfatal cerebrovascular event                                                    | 12 (2)               | 13            | 9 (2)                   | 10            | 3 (2)                     | 3             |                       |                    |                  |
| 3. Death from cardiovascular disease                                                 | 9 (1)                | 9             | 8 (2)                   | 8             | 1 (1)                     | 1             |                       |                    |                  |

\* Number of patients with each type of event, regardless of whether or not it is the initial event for that subject. † Cox proportional hazard regression models unadjusted; partially adjusted for DCCT closeout age, sex, and the following time-dependent covariates: smoking, sustained AER  $\geq 30$  or ESRD, eGFR  $< 15$  or ESRD, aspirin use, hormone replacement therapy use, and DCCT/EDIC time-weighted mean HbA1c; and fully adjusted to also include the following time-dependent covariates: systolic and diastolic blood pressure, anti-hypertensive medication use, total cholesterol, triglycerides, and lipid-lowering medication use.

SUPPLEMENTARY DATA

**Supplementary Table 5. Association in the DCCT *intensively* treated group between quartiles of weight gain during DCCT and subsequent cardiovascular events throughout EDIC follow-up.**

|                                                                                      | Overall              |               | Minimal Gainers (n=453) |               | Excessive Gainers (n=151) |               | Unadjusted       | Partially Adjusted | Fully Adjusted   |
|--------------------------------------------------------------------------------------|----------------------|---------------|-------------------------|---------------|---------------------------|---------------|------------------|--------------------|------------------|
|                                                                                      | No. of Patients (%)* | No. of Events | No. of Patients (%)*    | No. of Events | No. of Patients (%)*      | No. of Events |                  |                    |                  |
| Any cardiovascular disease event                                                     | 73 (12)              | 133           | 50 (11)                 | 93            | 23 (15)                   | 40            | 1.35 (0.83-2.22) | 1.14 (0.68-1.91)   | 1.02 (0.60-1.75) |
| 1. Nonfatal acute myocardial infarction                                              | 22 (4)               | 24            | 16 (4)                  | 17            | 6 (4)                     | 7             |                  |                    |                  |
| 2. Nonfatal cerebrovascular event                                                    | 8 (1)                | 9             | 6 (1)                   | 7             | 2 (1)                     | 2             |                  |                    |                  |
| 3. Death from cardiovascular disease                                                 | 6 (1)                | 6             | 4 (1)                   | 4             | 2 (1)                     | 2             |                  |                    |                  |
| 4. Silent myocardial infarction                                                      | 20 (3)               | 21            | 15 (3)                  | 16            | 5 (3)                     | 5             |                  |                    |                  |
| 5. Confirmed angina                                                                  | 15 (2)               | 15            | 11 (2)                  | 11            | 4 (3)                     | 4             |                  |                    |                  |
| 6. Revascularization                                                                 | 36 (6)               | 57            | 23 (5)                  | 37            | 13 (9)                    | 20            |                  |                    |                  |
| 7. Congestive Heart Failure                                                          | 1 (<1)               | 1             | 1 (<1)                  | 1             | 0 (0)                     | 0             |                  |                    |                  |
| Nonfatal myocardial infarction or stroke or death from cardiovascular disease (MACE) | 34 (6)               | 39            | 25 (6)                  | 28            | 9 (6)                     | 11            | 1.04 (0.48-2.22) | 0.87 (0.39-1.92)   | 1.01 (0.45-2.28) |
| 1. Nonfatal acute myocardial infarction                                              | 22 (4)               | 24            | 16 (4)                  | 17            | 6 (4)                     | 7             |                  |                    |                  |
| 2. Nonfatal cerebrovascular event                                                    | 8 (1)                | 9             | 6 (1)                   | 7             | 2 (1)                     | 2             |                  |                    |                  |
| 3. Death from cardiovascular disease                                                 | 6 (1)                | 6             | 4 (1)                   | 4             | 2 (1)                     | 2             |                  |                    |                  |

See text for definition of minimal and excess weight gainers. \* Number of patients with each type of event, regardless of whether or not it is the initial event for that subject. † Cox proportional hazard regression models unadjusted; partially adjusted for DCCT closeout age, sex, and the following time-dependent covariates: smoking, sustained AER  $\geq 30$  or ESRD, eGFR  $< 15$  or ESRD, aspirin use, hormone replacement therapy use, and DCCT/EDIC time-weighted mean HbA1c; and fully adjusted to also include the following time-dependent covariates: systolic and diastolic blood pressure, anti-hypertensive medication use, total cholesterol, triglycerides, and lipid-lowering medication use.
